# Supplementary material for: Air-stable, surface-oxide free Cu nanoparticles for highly conductive Cu ink and their application to printed graphene transistors
Source: Royal Society of Chemistry journal article supplement (doi:10.1039/c3tc00904a), 2013-01-01
Supplement: c3tc00904a.pdf [file c3tc00904a.pdf]

## Electronic Supplementary Information for

# **Air-stable, surface-oxide free Cu nanoparticle for highly conductive Cu ink and their application to printed, graphene transistor**

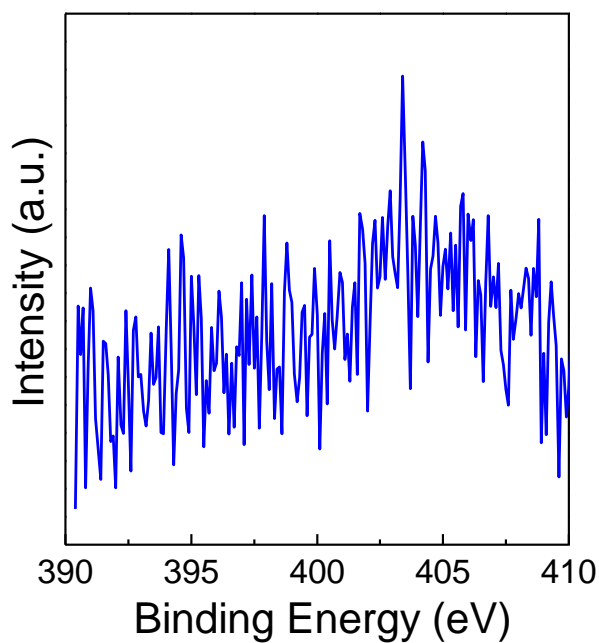

**Fig. S1** XPS N 1s spectrum for surface-oxide free Cu nanoparticles.

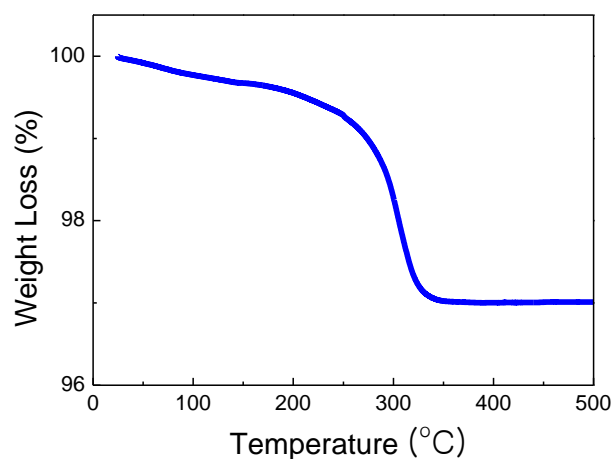

**Fig. S2** Thermal gravimetric analysis curves of surface-oxide free Cu nanoparticles. The heating rate was 5 °C/min. The weight loss below 200 °C is attributed to the adsorbed solvent and the weight loss above 200 °C is due to a thermal decomposition of capping molecule, oleic acid.

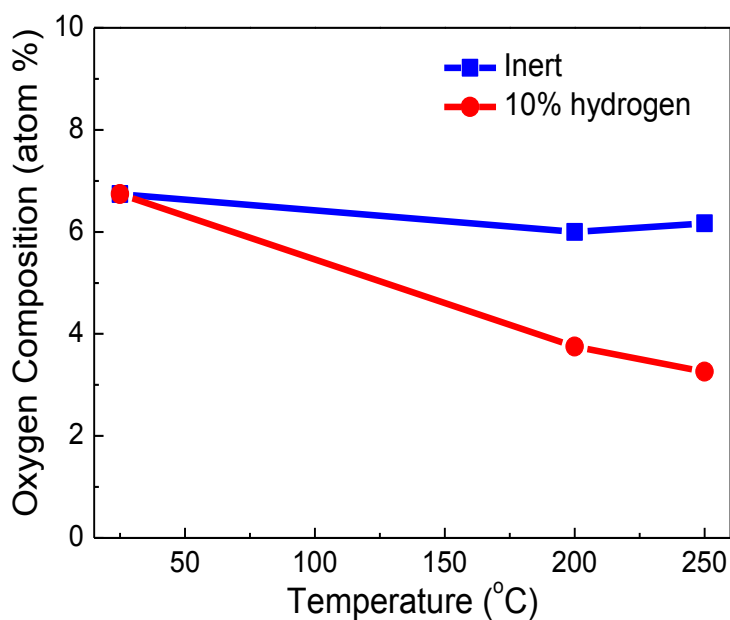

**Fig. S3** The oxygen composition for Cu films annealed at different temperatures under either an inert or 10% hydrogen atmosphere.

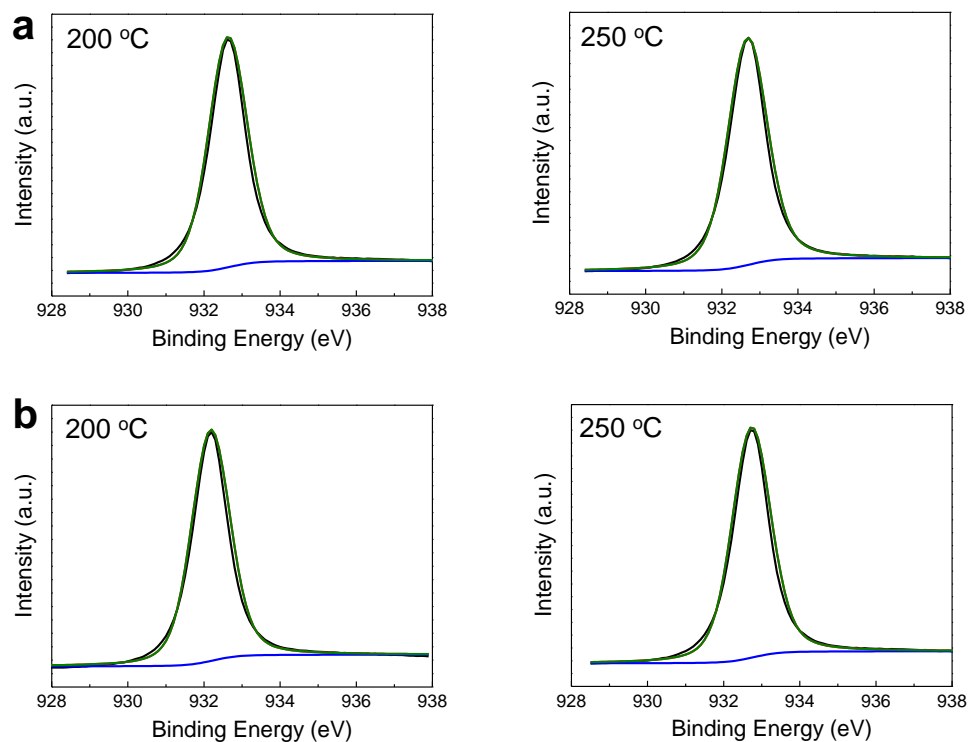

**Fig. S4** Cu 2p<sub>3/2</sub> spectra for solution-processed Cu electrode layer annealed under either (a) Ar atmosphere or (b) hydrogen (10%) atmosphere.

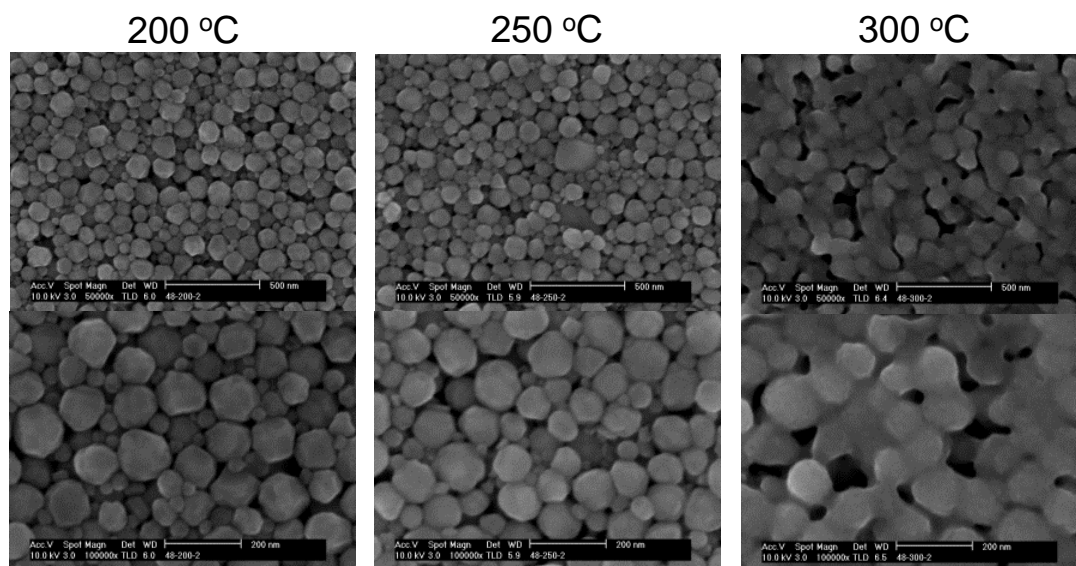

**Fig. S5** Top-view SEM image for solution-processed Cu electrode layers annealed at 200, 250 or 300 °C under Ar atmosphere.

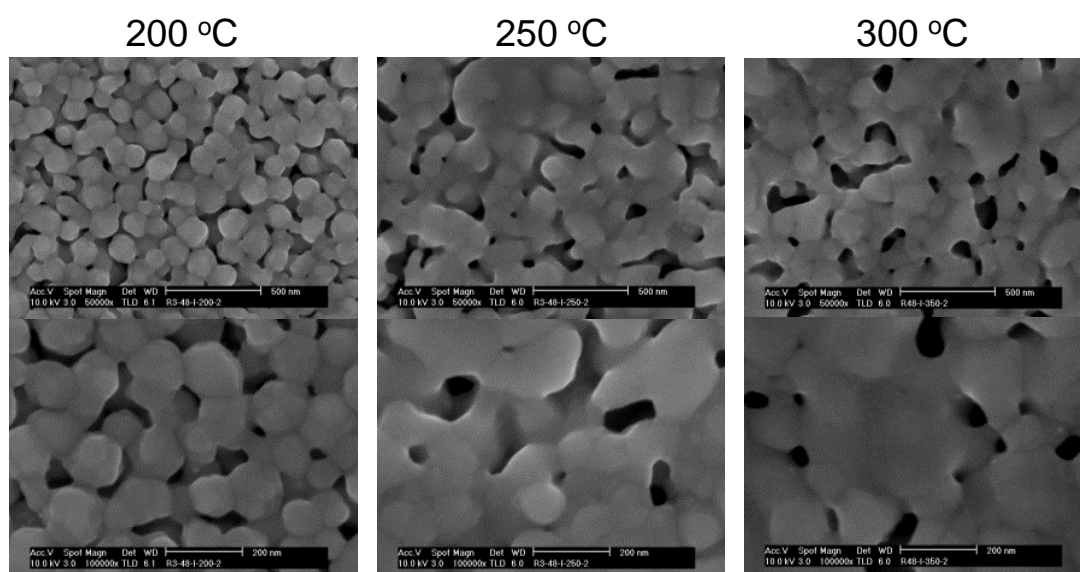

**Fig. S6** Top-view SEM image for solution-processed Cu electrode layers annealed at 200, 250 or 300 °C under hydrogen (10%) atmosphere.

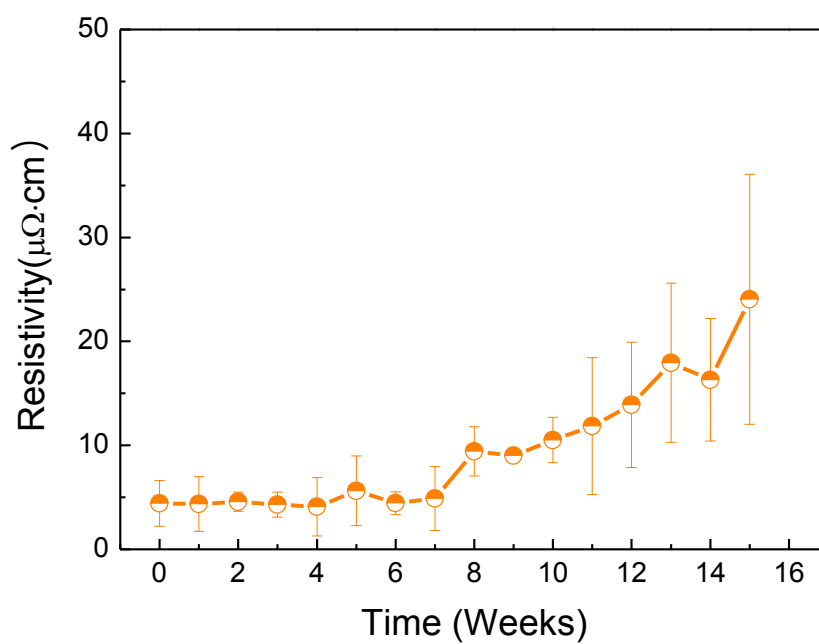

**Fig. S7** The resistivity variation of Cu films prepared using Cu nanoparticles stored in ink for different timeframes up to 15 weeks.
